# Supplementary material for: Genetic Manipulation of CB1 Cannabinoid Receptors Reveals a Role in Maintaining Proper Skeletal Muscle Morphology and Function in Mice
Source: MDPI journal article supplement (doi:10.3390/ijms232415653), 2022-12-09
Supplement: s1 [file s1]

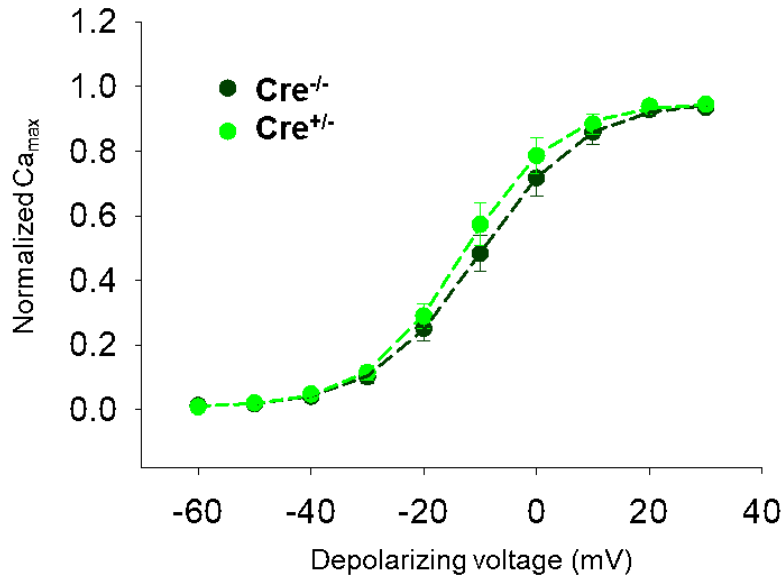

**Figure S1.**  $Ca_{max}$  values during repetitive 100 ms long membrane depolarizations applied from -60 to +30 mV on 21 and 27 FDB cells from  $Cre^{+/-}$  and  $Cre^{-/-}$  mice, respectively, normalized to the maximal change in calcium concentration measured on the given fiber.  $Ca_{max}$  was derived based on Eq. 1 detailed in Methods. Average values were fitted with a Boltzmann function (dashed curves) giving rise to the following parameters for  $Cre^{-/-}$ :  $V_{50} = -10.16$  mV,  $k = 9.15$  and  $Ca_{max} = 0.39 \pm 0.05$   $\mu$ M for  $Cre^{+/-}$ :  $V_{50} = -13.13$  mV,  $k = 8.31$  and  $Ca_{max} = 0.40 \pm 0.04$   $\mu$ M.

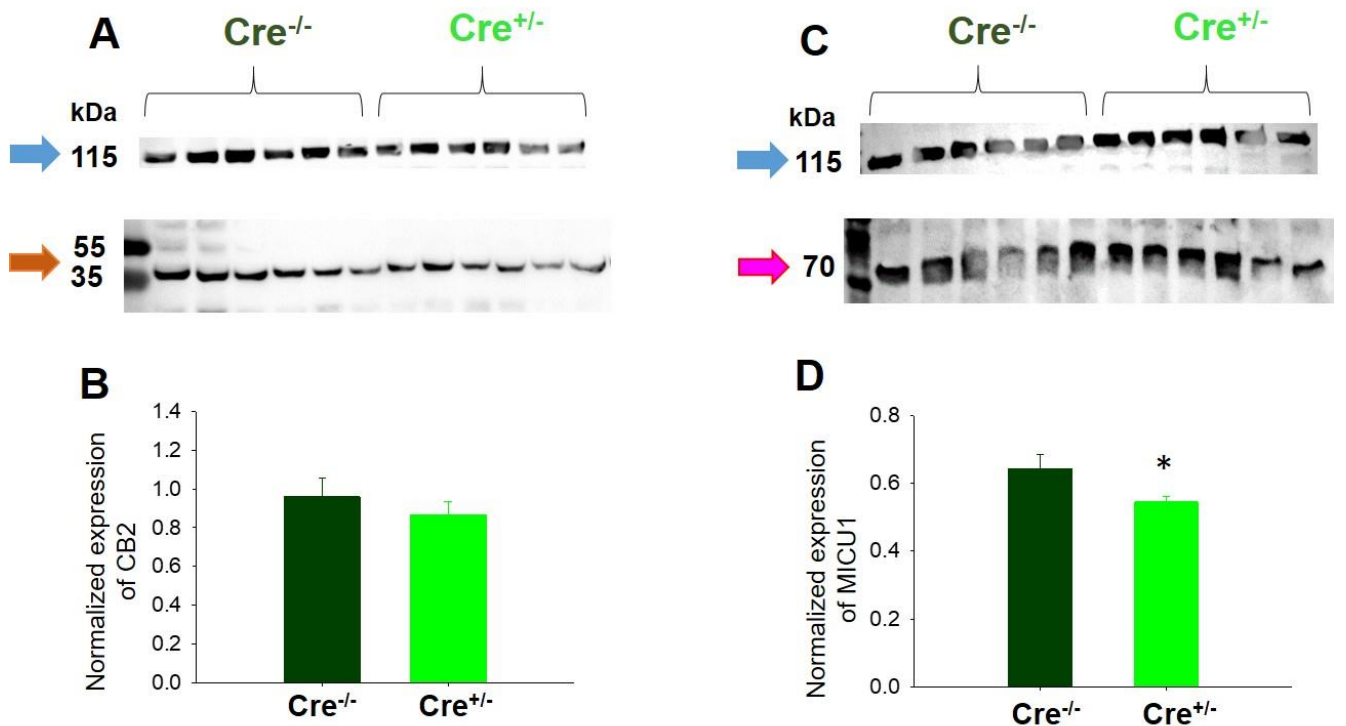

**Figure S2.** Western Blot analysis of TA muscle samples. Panels A and C are representative images illustrating the changes of protein expression for CB2 and MICU1 (orange and magenta arrows, 45 and 70 kDa) upon CB1 genetic manipulation and alpha-actinin (blue arrows, 115 kDa) that was used as internal control for normalizing purposes. Panels B and D are

the average normalized protein expression levels in the two samples for CB2 and MICU1, respectively. 6 animals per group were analyzed in at least 3 different independent experiments. \*p<0.05

| Nr. of pulses | F/F <sub>0</sub>   |                    | Amount of Ca <sup>2+</sup> released (μM) |                    | Peak release flux (mM/s) |                    | Steady flux (mM/s) |                    |
|---------------|--------------------|--------------------|------------------------------------------|--------------------|--------------------------|--------------------|--------------------|--------------------|
|               | Cre <sup>-/-</sup> | Cre <sup>+/-</sup> | Cre <sup>-/-</sup>                       | Cre <sup>+/-</sup> | Cre <sup>-/-</sup>       | Cre <sup>+/-</sup> | Cre <sup>-/-</sup> | Cre <sup>+/-</sup> |
| Nr. of cells  | 19                 | 26                 | 19                                       | 26                 | 19                       | 26                 | 19                 | 26                 |
| 1             | 2.63±0.22          | 2.77±0.20          | 834.44±62.52                             | 812.74±123.53      | 10.72±1.57               | 11.81±1.09         | 2.83±0.36          | 3.01±0.22          |
| 2             | 2.48±0.19          | 2.58±0.15          | 607.01±57.06                             | 588.84±84.68       | 5.95±0.83                | 6.94±0.55          | 1.80±0.26          | 2.03±0.15          |
| 3             | 2.33±0.17          | 2.44±0.14          | 545.05±51.82                             | 512.57±0.77        | 5.00±0.75                | 5.91±0.51          | 1.51±0.23          | 1.71±0.14          |
| 4             | 2.20±0.16          | 2.31±0.12          | 498.13±47.93                             | 468.42±0.70        | 4.41±0.67                | 5.39±0.45          | 1.33±0.20          | 1.59±0.13          |
| 5             | 2.08±0.15          | 2.20±0.11          | 463.48±45.37                             | 420.34±0.65        | 3.94±0.61                | 5.13±0.47          | 1.27±0.19          | 1.46±0.11          |
| 6             | 1.99±0.14          | 2.11±0.10          | 427.30±42.06                             | 380.15±0.61        | 3.69±0.58                | 4.63±0.40          | 1.18±0.18          | 1.40±0.12          |
| 7             | 1.91±0.13          | 2.02±0.10          | 394.25±39.66                             | 352.62±0.58        | 3.37±0.55                | 4.26±0.38          | 1.11±0.17          | 1.27±0.11          |
| 8             | 1.84±0.12          | 1.95±0.09          | 361.86±37.5                              | 326.58±0.55        | 3.08±0.51                | 4.08±0.37          | 0.99±0.17          | 1.19±0.10          |

**Table S1.** Average parameters of the voltage induced calcium transients and calculated release fluxes during tetanic stimulation on FDB muscles.
